# Supplementary material for: Climate Change Influences on the Global Potential Distribution of Bluetongue Virus
Source: PubMed Central journal article supplement (PMC4784974; doi:10.1371/journal.pone.0150489), 2016-03-09
Supplement: pone.0150489.s003.pdf [file pone.0150489.s003.pdf]

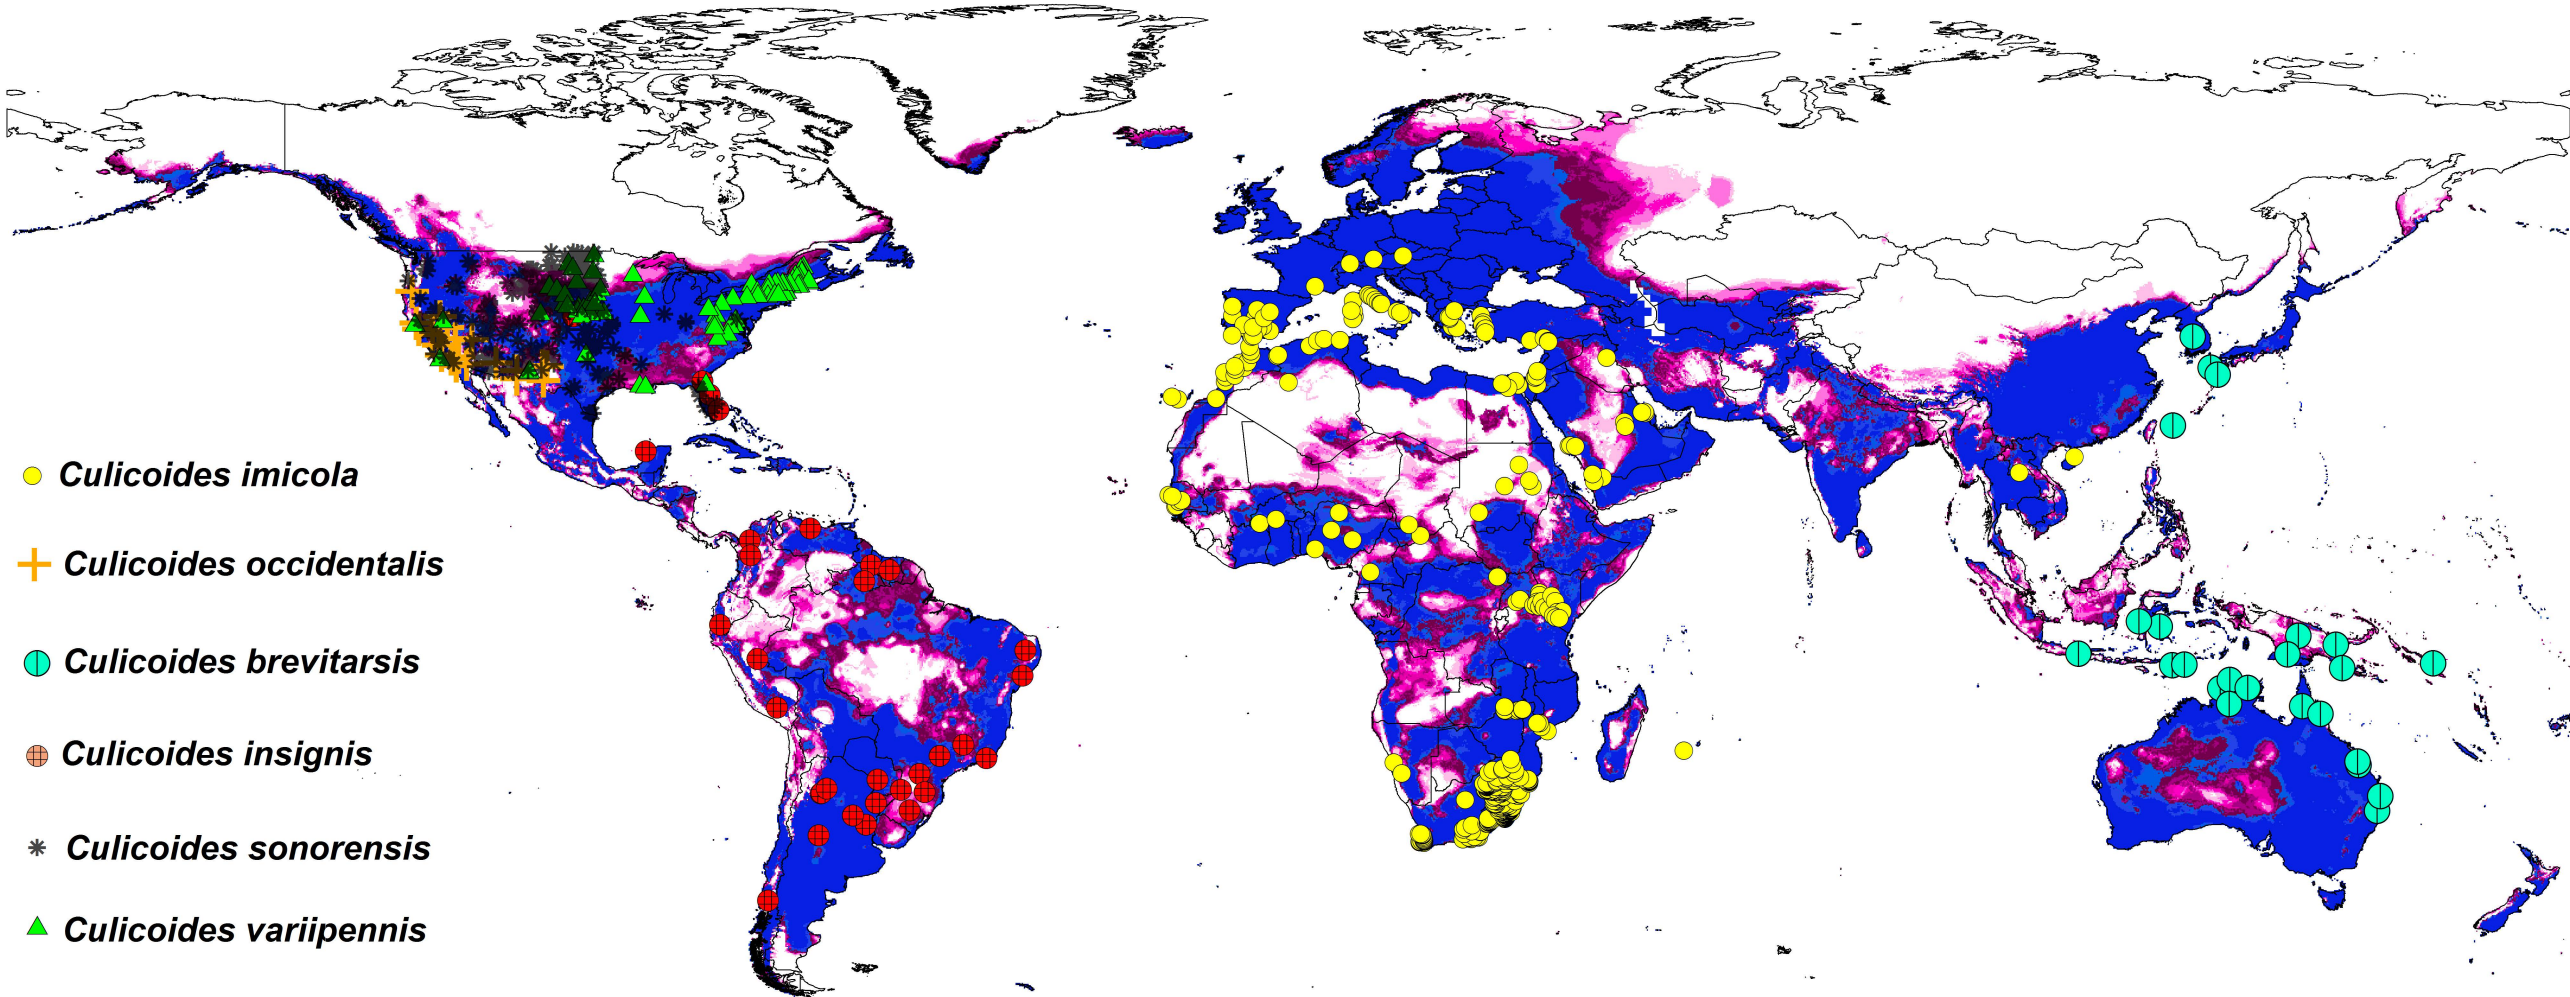

● *Culicoides imicola*

⊕ *Culicoides occidentalis*

● *Culicoides brevitarsis*

⊗ *Culicoides insignis*

\* *Culicoides sonorensis*

▲ *Culicoides variipennis*
