# Supplementary material for: Climate Change Influences on the Global Potential Distribution of Bluetongue Virus
Source: PubMed Central journal article supplement (PMC4784974; doi:10.1371/journal.pone.0150489), 2016-03-09
Supplement: pone.0150489.s005.pdf [file pone.0150489.s005.pdf]

**S5 File:** Results of background similarity tests assessing niche similarity between bluetongue virus and six vector species. The null hypothesis of niche similarity was rejected if the observed *D* or *I* values for the BTV and vector species in question fell the 5<sup>th</sup> percentile in the random-replicate distribution (i.e. 5% in table).

| <i>Species</i>                 | Schoener's <i>D</i> |       |       |                 | Hellinger's <i>I</i> |       |       |                 |
|--------------------------------|---------------------|-------|-------|-----------------|----------------------|-------|-------|-----------------|
|                                | Observed            | 5%    | 95%   | <i>P</i> value  | Observed             | 5%    | 95%   | <i>P</i> value  |
| <i>Culicoides imicola</i>      | 0.585               | 0.466 | 0.863 | <i>P</i> > 0.05 | 0.847                | 0.677 | 0.926 | <i>P</i> > 0.05 |
| <i>Culicoides insignis</i>     | 0.615               | 0.382 | 0.683 | <i>P</i> > 0.05 | 0.873                | 0.514 | 0.944 | <i>P</i> > 0.05 |
| <i>Culicoides variipennis</i>  | 0.618               | 0.419 | 0.804 | <i>P</i> > 0.05 | 0.872                | 0.615 | 0.966 | <i>P</i> > 0.05 |
| <i>Culicoides sonorensis</i>   | 0.696               | 0.429 | 0.717 | <i>P</i> > 0.05 | 0.923                | 0.598 | 0.958 | <i>P</i> > 0.05 |
| <i>Culicoides brevitarsis</i>  | 0.708               | 0.322 | 0.942 | <i>P</i> > 0.05 | 0.927                | 0.551 | 0.956 | <i>P</i> > 0.05 |
| <i>Culicoides occidentalis</i> | 0.505               | 0.233 | 0.739 | <i>P</i> > 0.05 | 0.805                | 0.366 | 0.821 | <i>P</i> > 0.05 |
