# Supplementary material for: Climate Change Influences on the Global Potential Distribution of Bluetongue Virus
Source: PubMed Central journal article supplement (PMC4784974; doi:10.1371/journal.pone.0150489), 2016-03-09

RCP 2.6

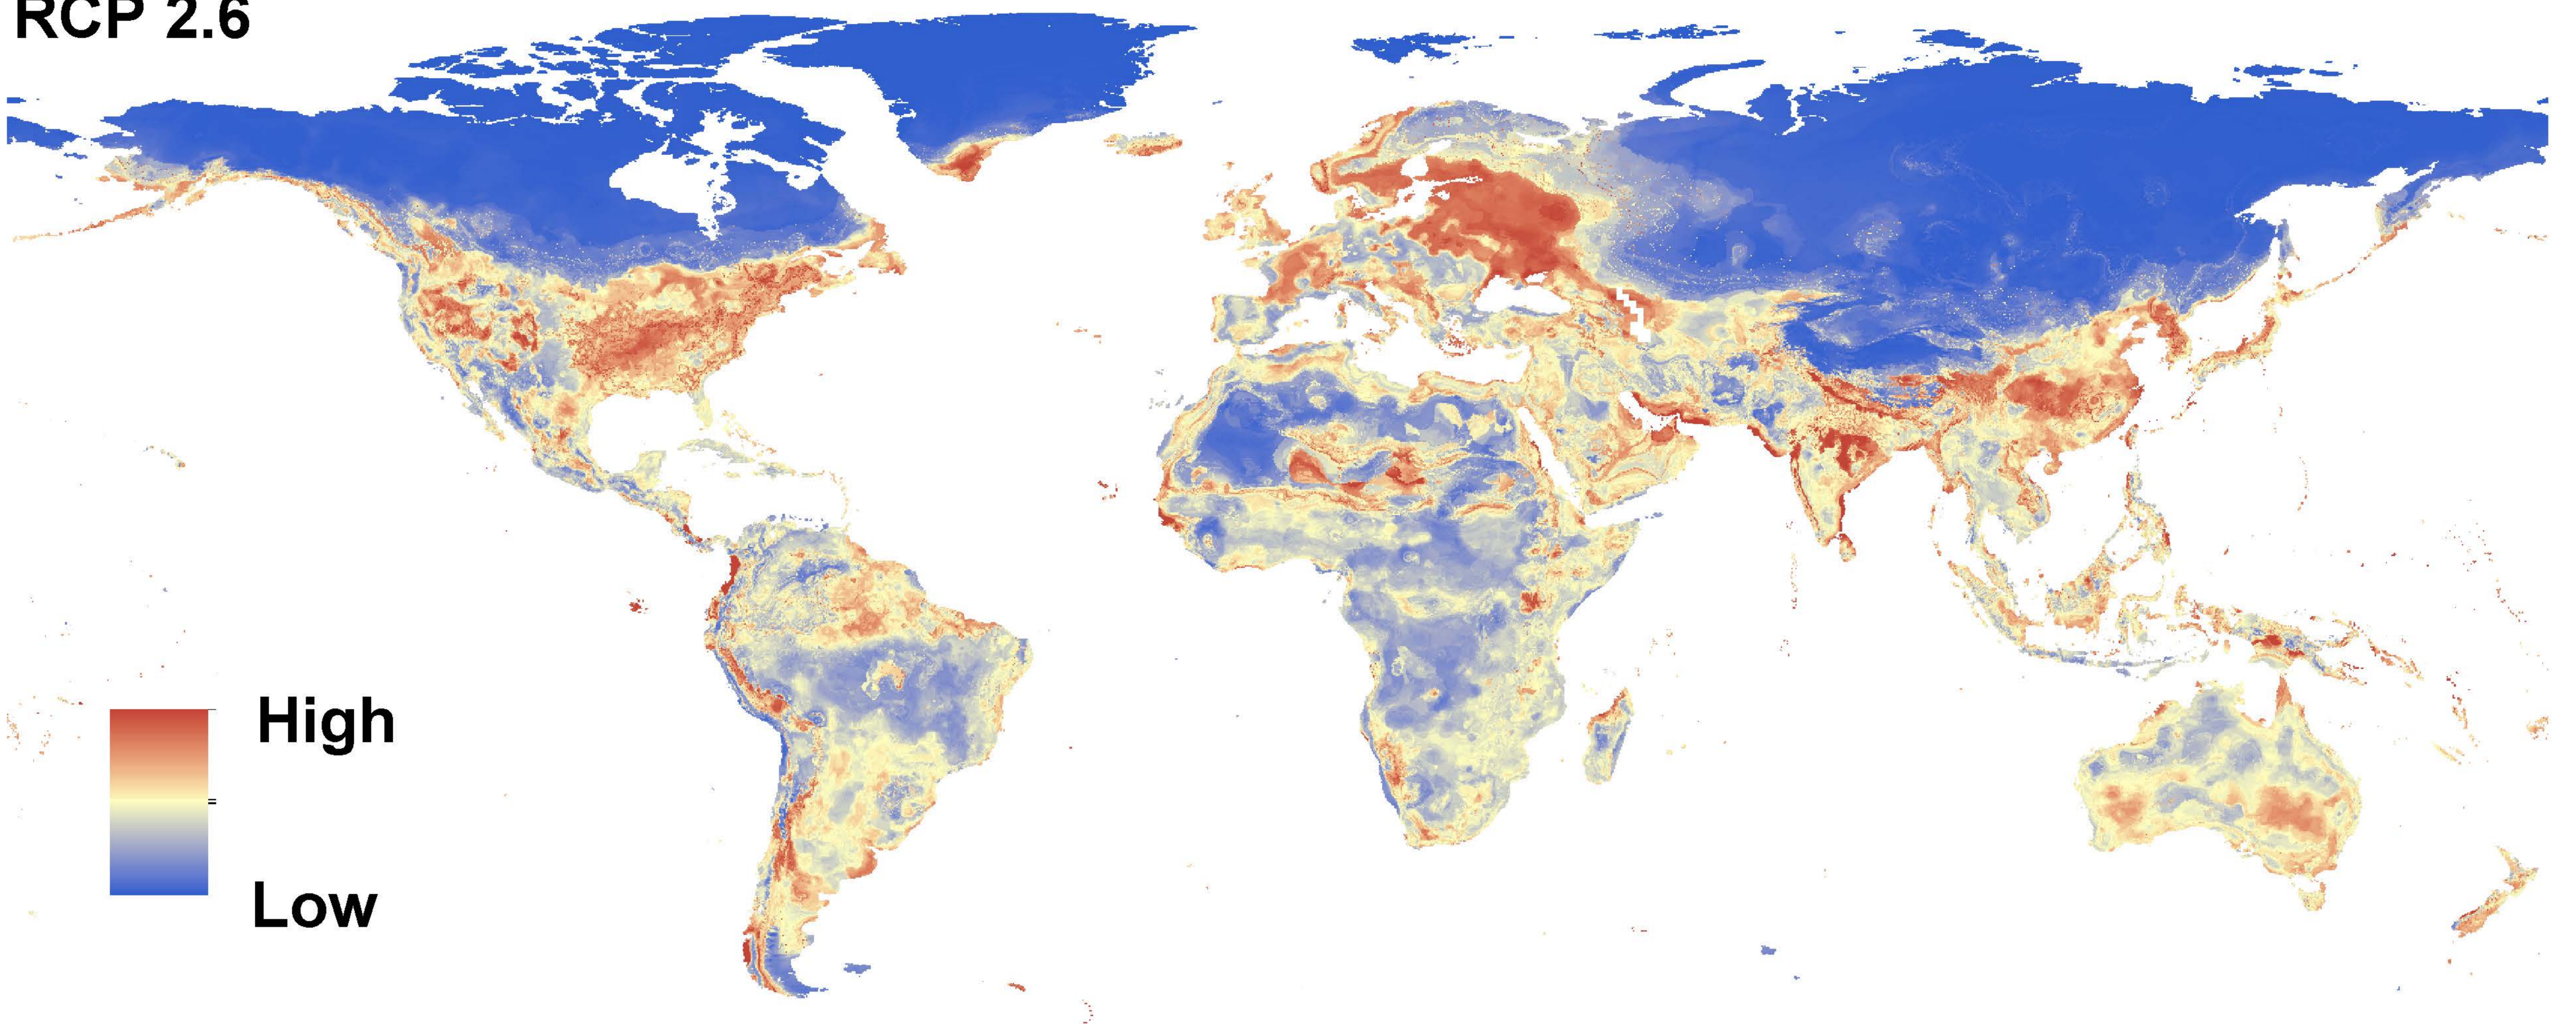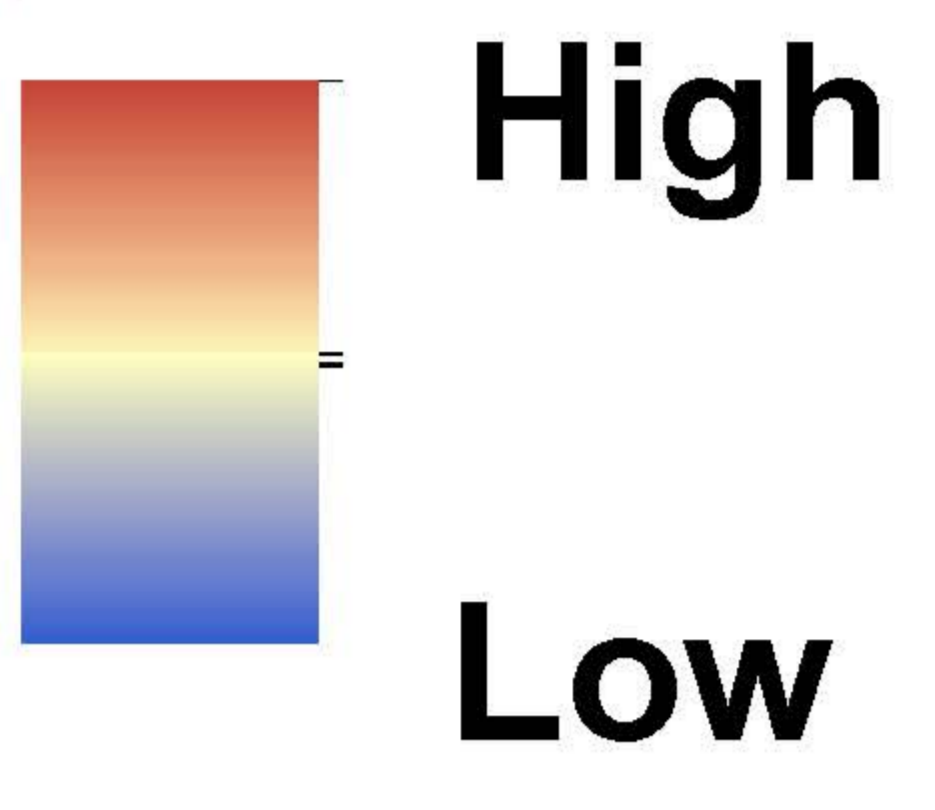

RCP 4.5

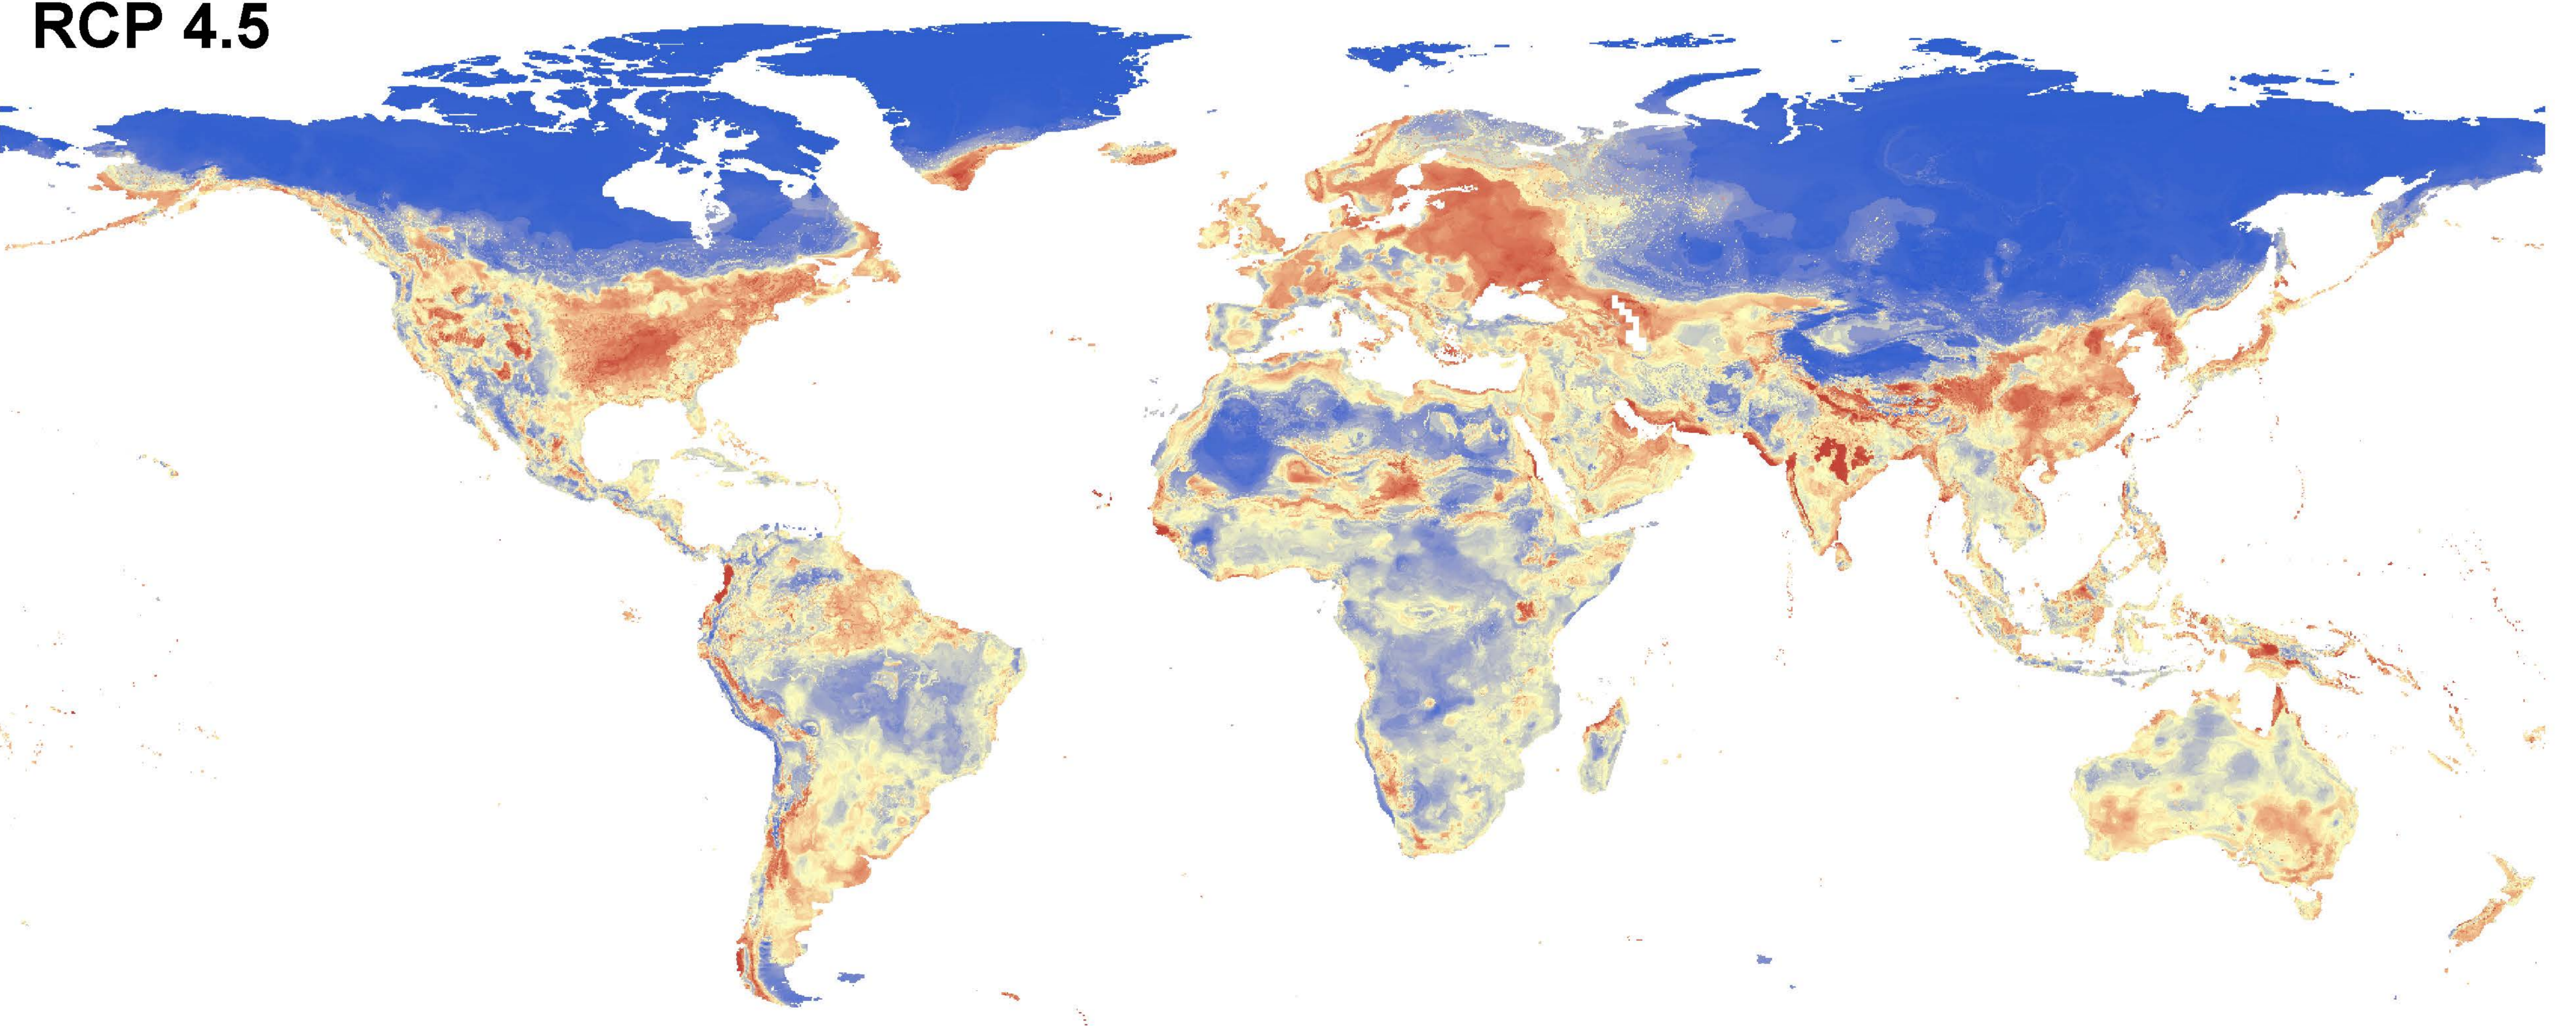

RCP 6.0

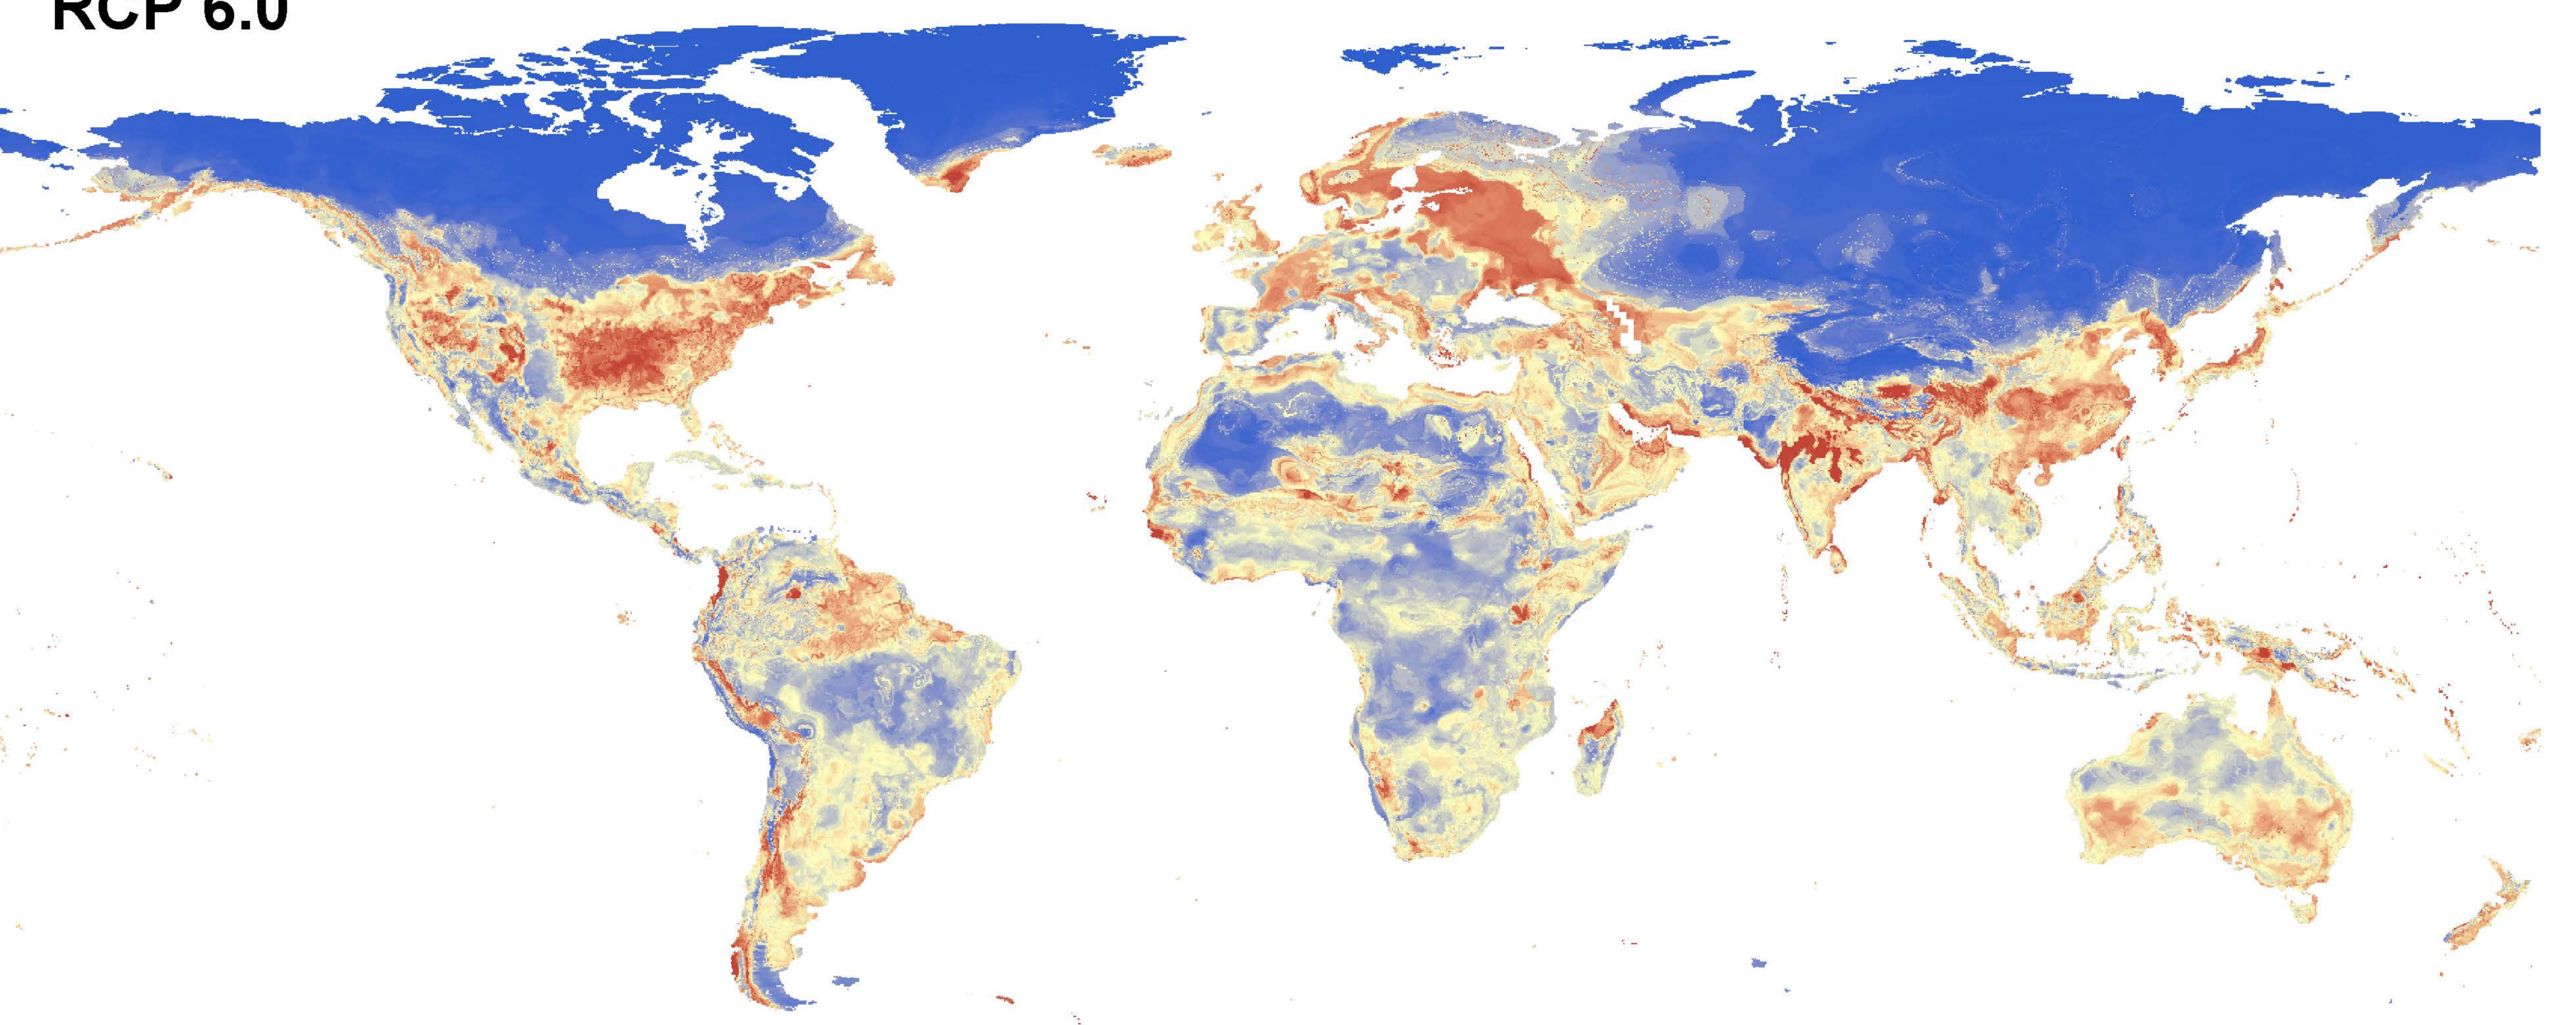

RCP 8.5

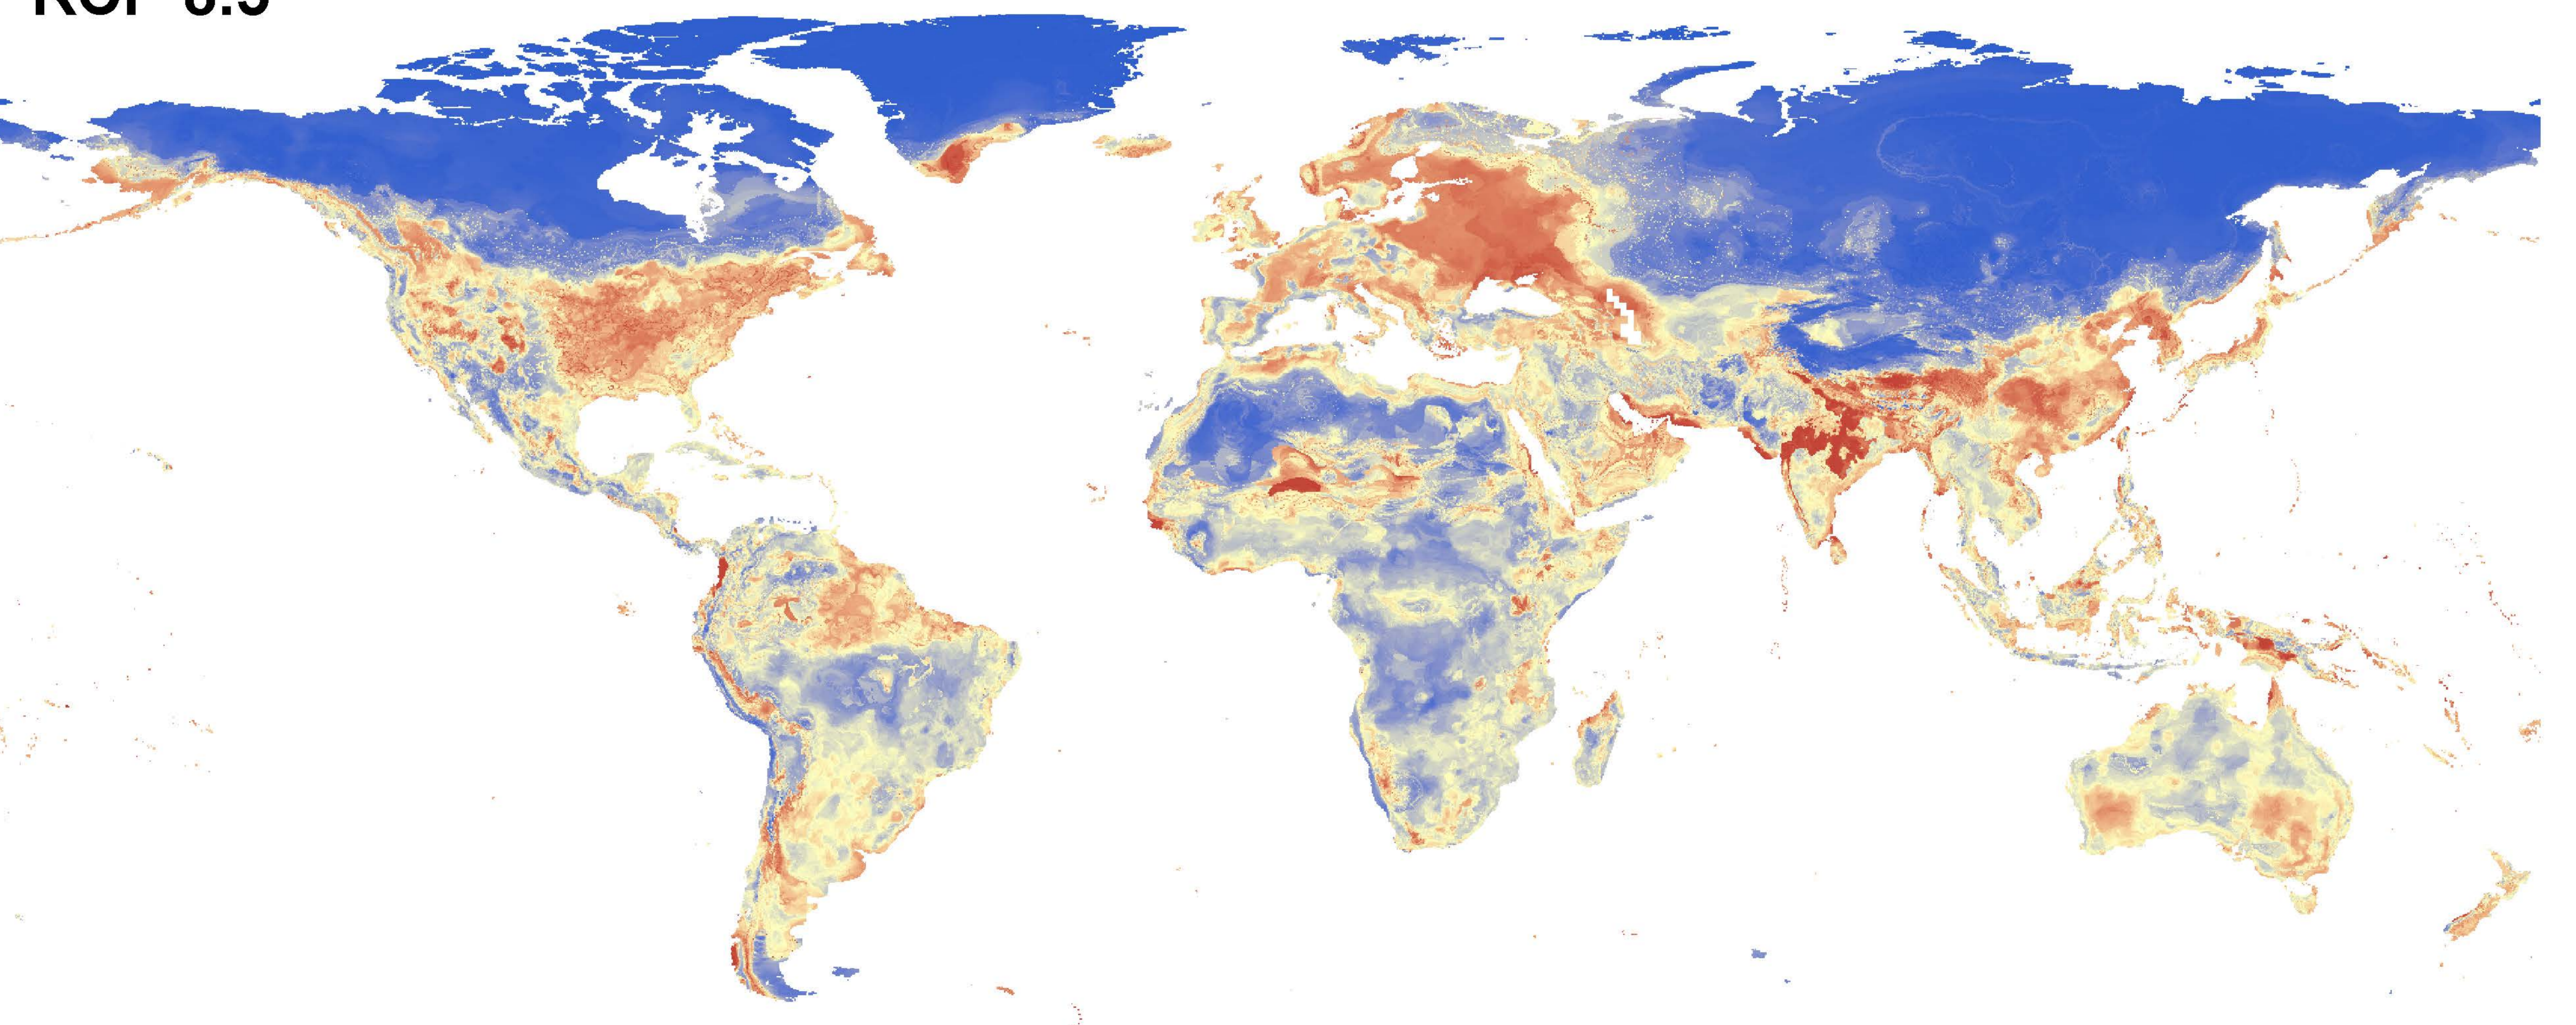

Supplement: pone.0150489.s006.pdf [file pone.0150489.s006.pdf]
